# Supplementary material for: Impact of practicing internal benchmarking on continuous improvement of cataract surgery outcomes: a retrospective observational study at Aravind Eye Hospitals, India
Source: PubMed Central journal article supplement — BMJ Open. 2023 Jun 22;13(6):e071860. doi: 10.1136/bmjopen-2023-071860 (PMC10314652; doi:10.1136/bmjopen-2023-071860), 2023-06-22
Supplement: bmjopen-2023-071860supp001.pdf [file bmjopen-2023-071860supp001.pdf]

## Supplementary Figure-1: Automated email to individual surgeon with cataract surgery results

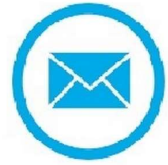

Dear Doctor,

Sharing the details of your cataract surgical volume and outcome for the month of **Jan 2021**. Kindly log on [aecscatqa.aravind.org](http://aecscatqa.aravind.org), [aecscatqa.aravind.org](http://aecscatqa.aravind.org) to find a much more detailed report on complications and visual outcome. Please feel free to log in and change your password. You will also be able to benchmark yourself with your colleagues while the individual surgeon's performance details will be kept confidential. We have designed this system with the hope that you will be able to use this information to improve the quality of your surgery specifically the uncorrected visual outcome.

If you are not fully familiar with using the system, please contact **Ms Arumugaselvi / Ms Mariammal, IOL Clinic** for a quick demo.

If your surgical data and outcome data are not correct, kindly send the details of what needs to be corrected to [iolclinic@aravind.org](mailto:iolclinic@aravind.org).

If you have any suggestions regarding the improvement of the system, kindly send them to [iolcoord@aravind.org](mailto:iolcoord@aravind.org).

| Surgical Volume                                                |        |
|----------------------------------------------------------------|--------|
| No. of ECCE surgeries                                          | 0      |
| No. of SICS surgeries                                          | 74     |
| No. of Phaco surgeries                                         | 28     |
| Complication Rate                                              |        |
| Intra operative complication rate                              | 1.96%  |
| Post-operative complication rate                               | 6.86%  |
| Resurgery rate                                                 | 0.98%  |
| Endophthalmitis rate                                           | 0.00%  |
| Follow-up unaided distance visual outcome                      |        |
| 6/18 & better visual acuity percentage (For ECCE & SICS cases) | 80%    |
| 6/12 & Better visual acuity percentage (For Phaco cases)       | 83.33% |
| Follow-up best-corrected distance visual outcome               |        |
| 6/9 & Better visual acuity percentage (For ECCE & SICS cases)  | 86.67% |
| 6/9 & Better visual acuity percentage (For Phaco cases)        | 95.83% |

With Warm Regards,  
Cataract Surgery Outcome Monitoring Team.
