# Supplementary material for: Impact of practicing internal benchmarking on continuous improvement of cataract surgery outcomes: a retrospective observational study at Aravind Eye Hospitals, India
Source: PubMed Central journal article supplement — BMJ Open. 2023 Jun 22;13(6):e071860. doi: 10.1136/bmjopen-2023-071860 (PMC10314652; doi:10.1136/bmjopen-2023-071860), 2023-06-22

Supplementary Figure-2: Trend of outcome parameters of a surgeon comparing average and best performed surgeon

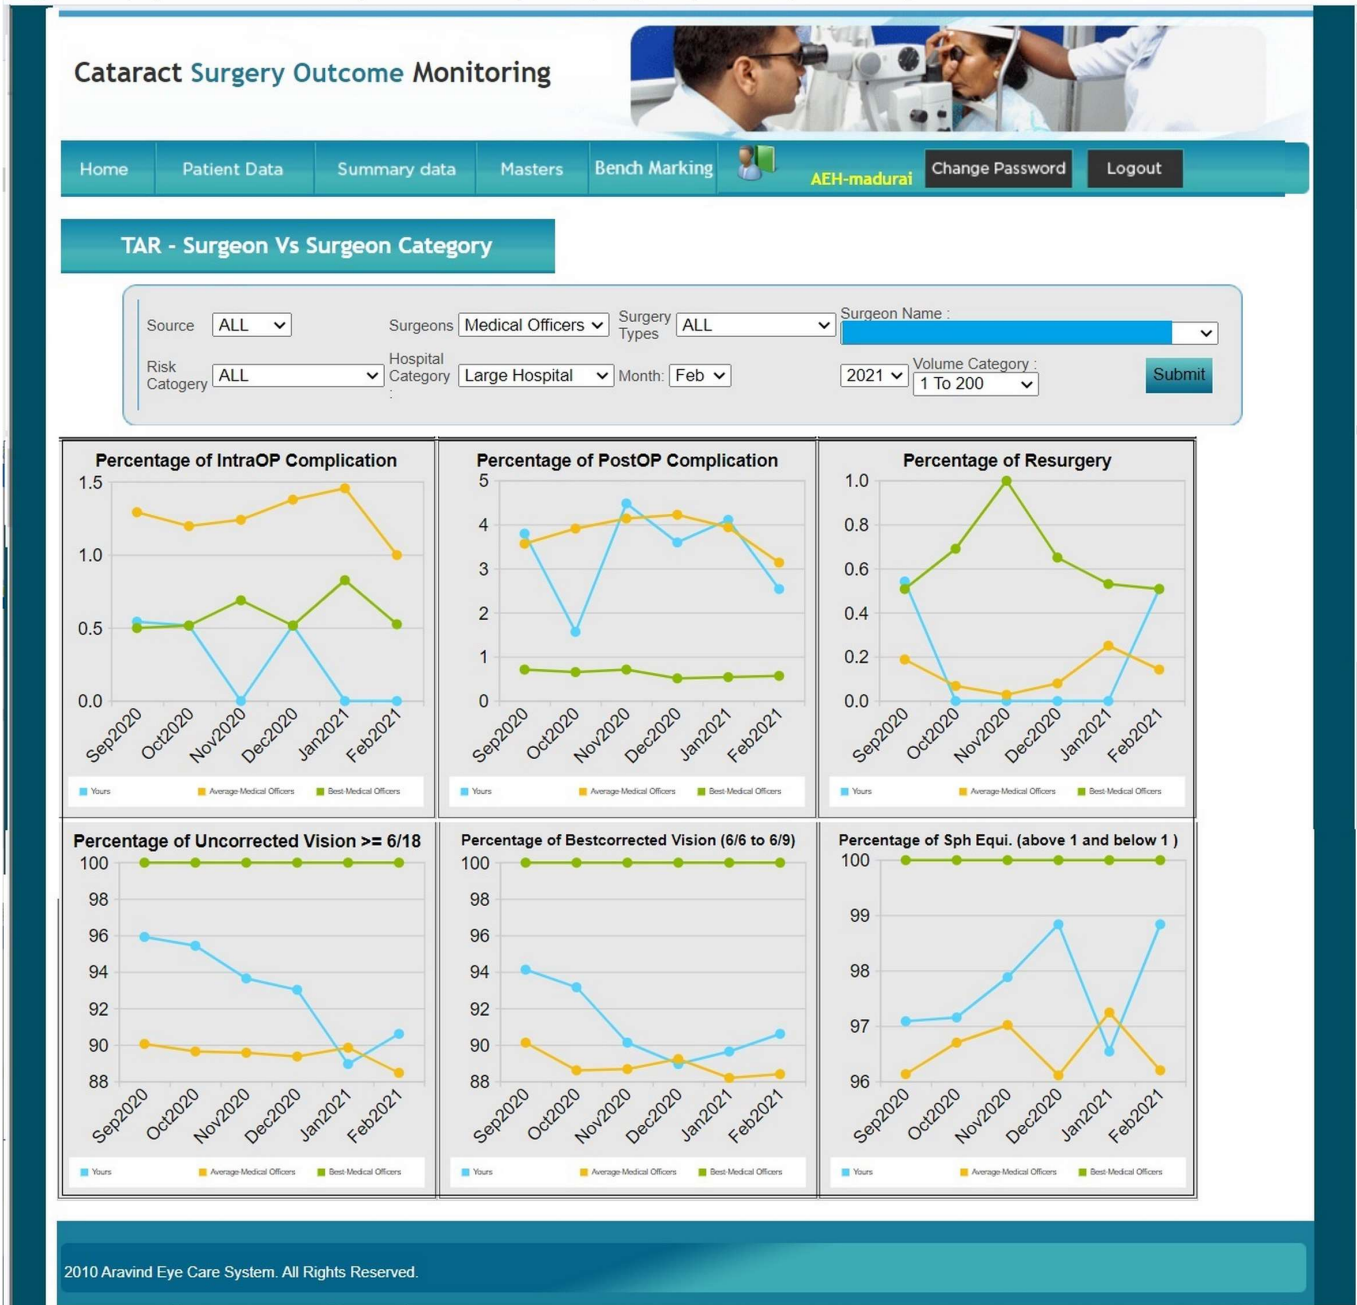

Supplement: bmjopen-2023-071860supp002.pdf [file bmjopen-2023-071860supp002.pdf]
