# Supplementary material for: Impact of practicing internal benchmarking on continuous improvement of cataract surgery outcomes: a retrospective observational study at Aravind Eye Hospitals, India
Source: PubMed Central journal article supplement — BMJ Open. 2023 Jun 22;13(6):e071860. doi: 10.1136/bmjopen-2023-071860 (PMC10314652; doi:10.1136/bmjopen-2023-071860), 2023-06-22

Supplementary Figure-3: Benchmarking of the outcome of the select hospital with the overall average of all the hospitals and the best-performing hospital

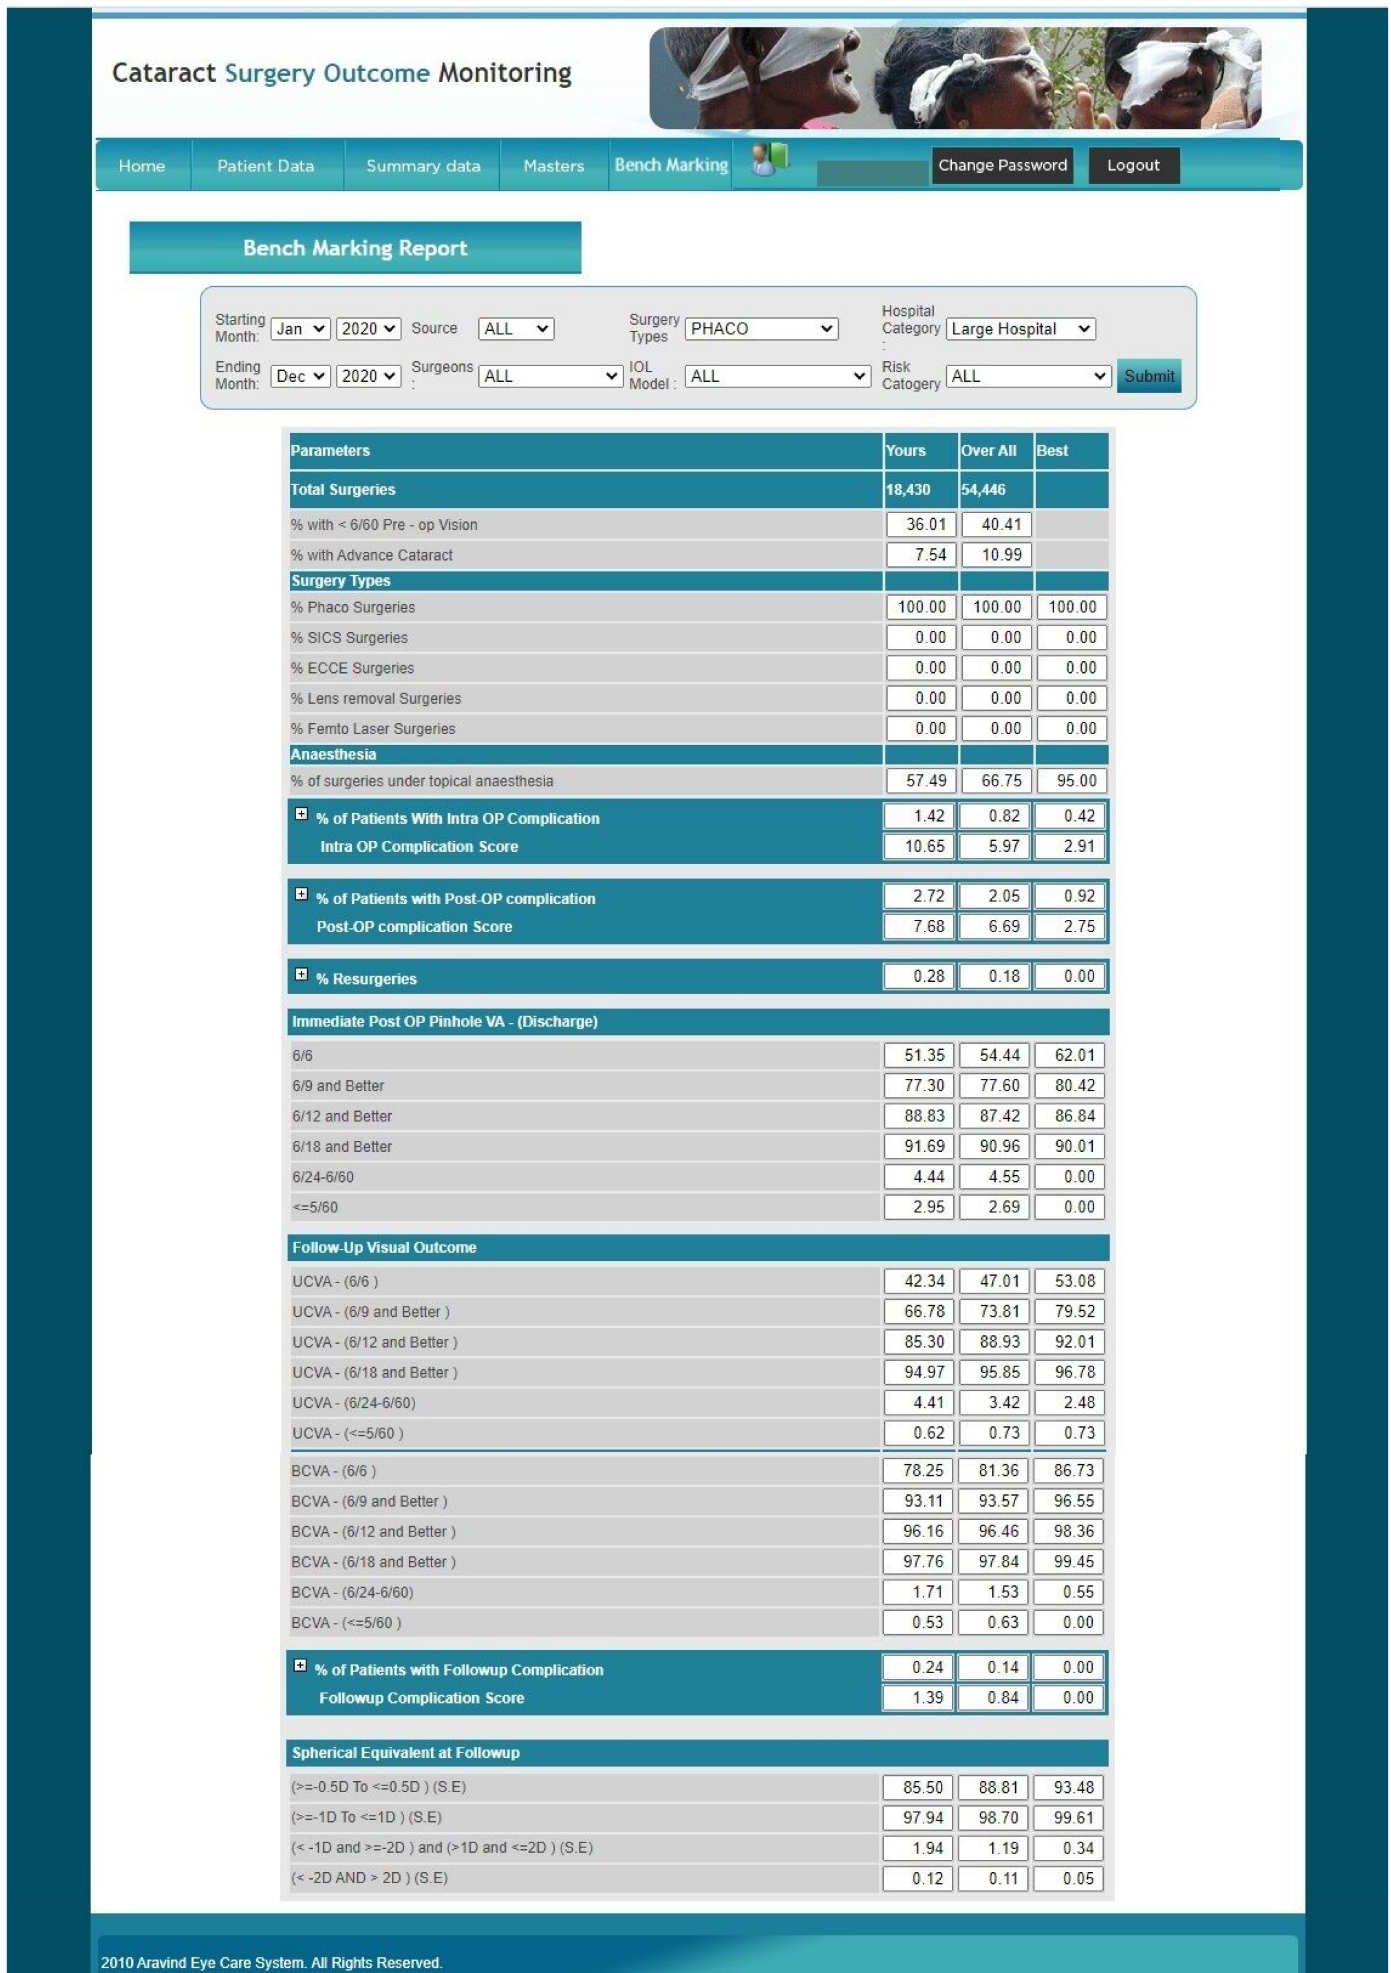

Supplement: bmjopen-2023-071860supp003.pdf [file bmjopen-2023-071860supp003.pdf]
