# Supplementary material for: Impact of practicing internal benchmarking on continuous improvement of cataract surgery outcomes: a retrospective observational study at Aravind Eye Hospitals, India
Source: PubMed Central journal article supplement — BMJ Open. 2023 Jun 22;13(6):e071860. doi: 10.1136/bmjopen-2023-071860 (PMC10314652; doi:10.1136/bmjopen-2023-071860), 2023-06-22
Supplement: bmjopen-2023-071860supp005.pdf [file bmjopen-2023-071860supp005.pdf]

## Supplementary Table-1: Data tables of Figures 2 to 4

## S1a. Figure-2 Data Table: % of patients with Intraoperative complications in cataract surgery in ten study hospitals (H1-H10)

| Year | H1    | H2    | H3    | H4    | H5    | H6    | H7    | H8    | H9    | H10   | AVERAGE | SD    | Coefficient of Variation |
|------|-------|-------|-------|-------|-------|-------|-------|-------|-------|-------|---------|-------|--------------------------|
| 2012 | 1.71% | 0.67% | 0.79% | 1.84% | 0.77% | 1.12% | 1.74% | 0.25% | 1.66% | 1.02% | 1.2%    | 0.55% | 48%                      |
| 2013 | 1.36% | 0.74% | 0.62% | 1.70% | 0.98% | 0.34% | 2.08% | 0.96% | 0.24% | 0.69% | 1.0%    | 0.59% | 60%                      |
| 2014 | 1.10% | 0.62% | 0.49% | 1.32% | 0.93% | 0.26% | 2.61% | 0.85% | 0.34% | 0.55% | 0.9%    | 0.69% | 76%                      |
| 2015 | 1.19% | 0.63% | 0.56% | 0.85% | 0.72% | 0.23% | 1.98% | 0.57% | 0.37% | 1.08% | 0.8%    | 0.50% | 62%                      |
| 2016 | 1.27% | 1.20% | 0.54% | 0.47% | 0.53% | 0.20% | 1.43% | 1.02% | 0.46% | 0.67% | 0.8%    | 0.42% | 54%                      |
| 2017 | 1.46% | 0.74% | 0.56% | 0.74% | 0.46% | 0.18% | 1.14% | 0.18% | 0.63% | 0.65% | 0.7%    | 0.39% | 58%                      |
| 2018 | 1.28% | 0.31% | 0.58% | 0.56% | 0.51% | 0.11% | 0.72% | 0.22% | 0.17% | 0.10% | 0.5%    | 0.36% | 80%                      |
| 2019 | 1.51% | 0.38% | 0.59% | 0.39% | 0.58% | 0.14% | 0.54% | 0.27% | 0.29% | 0.20% | 0.5%    | 0.39% | 80%                      |
| 2020 | 1.39% | 0.50% | 0.42% | 0.29% | 0.52% | 0.46% | 1.40% | 0.24% | 0.19% | 0.56% | 0.6%    | 0.44% | 73%                      |

S1b. Figure-3 Data Table: % of patients with uncorrected visual acuity ( $\geq 6/12$  [20/40]) at postoperative follow-up visit (2 to 7 weeks) in ten study hospitals (H1-H10)

| Year | H1    | H2    | H3    | H4    | H5    | H6    | H7    | H8    | H9    | H10   | AVERAGE | SD   | Coefficient of Variation |
|------|-------|-------|-------|-------|-------|-------|-------|-------|-------|-------|---------|------|--------------------------|
| 2012 | 84.0% | 75.7% | 72.2% | 79.1% | 85.0% | 85.2% | 86.5% | 89.5% | 76.5% | 74.8% | 80.8%   | 5.9% | 7.3%                     |
| 2013 | 86.4% | 81.7% | 77.8% | 82.2% | 82.8% | 88.2% | 88.2% | 83.1% | 82.3% | 76.5% | 83.5%   | 3.9% | 4.7%                     |
| 2014 | 87.9% | 90.8% | 84.2% | 85.3% | 86.6% | 94.7% | 88.9% | 91.6% | 84.9% | 77.1% | 87.2%   | 4.9% | 5.6%                     |
| 2015 | 86.7% | 87.8% | 87.2% | 89.4% | 89.1% | 92.5% | 88.9% | 86.9% | 87.2% | 86.0% | 87.9%   | 1.9% | 2.1%                     |
| 2016 | 90.8% | 89.9% | 88.8% | 90.2% | 90.7% | 89.1% | 90.1% | 92.7% | 89.4% | 90.0% | 90.2%   | 1.1% | 1.2%                     |
| 2017 | 91.1% | 90.3% | 86.3% | 90.5% | 88.2% | 86.3% | 87.4% | 90.1% | 88.4% | 89.7% | 89.4%   | 1.8% | 2.0%                     |
| 2018 | 89.8% | 88.0% | 86.8% | 88.6% | 88.7% | 86.1% | 86.3% | 86.3% | 90.7% | 93.0% | 88.4%   | 2.2% | 2.5%                     |
| 2019 | 84.2% | 87.4% | 86.9% | 88.7% | 87.6% | 87.8% | 84.5% | 86.3% | 89.1% | 93.3% | 87.6%   | 2.6% | 2.9%                     |
| 2020 | 85.3% | 83.9% | 88.6% | 90.2% | 92.0% | 92.6% | 89.2% | 88.2% | 92.2% | 95.7% | 89.8%   | 3.5% | 4.0%                     |

S1c. Figure-4 Data Table: % of patients with Spherical Equivalent (within  $\pm 0.5D$ ) at post-operative follow-up visit in ten study hospitals (H1-H10)

| Year | H1    | H2    | H3    | H4    | H5    | H6    | H7    | H8    | H9    | H10   | AVERAGE | SD   | Coefficient of Variation |
|------|-------|-------|-------|-------|-------|-------|-------|-------|-------|-------|---------|------|--------------------------|
| 2012 | 86.3% | 75.6% | 71.9% | 77.7% | 80.6% | 70.9% | 84.7% | 80.8% | 73.9% | 60.1% | 76.3%   | 7.2% | 9.5%                     |
| 2013 | 85.6% | 75.2% | 74.7% | 79.7% | 80.9% | 77.5% | 88.1% | 72.3% | 67.7% | 63.8% | 76.6%   | 7.2% | 9.5%                     |
| 2014 | 87.7% | 85.2% | 80.3% | 86.1% | 84.4% | 83.3% | 88.0% | 84.0% | 73.6% | 64.3% | 81.7%   | 7.5% | 9.2%                     |
| 2015 | 90.9% | 87.2% | 84.6% | 91.5% | 90.4% | 83.3% | 87.1% | 82.8% | 76.3% | 79.9% | 85.4%   | 4.9% | 5.7%                     |
| 2016 | 91.9% | 88.6% | 84.9% | 93.8% | 92.7% | 83.3% | 88.0% | 86.5% | 77.6% | 89.4% | 87.7%   | 4.9% | 5.6%                     |
| 2017 | 91.4% | 88.1% | 84.0% | 93.2% | 91.3% | 79.4% | 88.6% | 86.7% | 80.8% | 92.0% | 87.6%   | 4.9% | 5.6%                     |
| 2018 | 90.1% | 80.0% | 86.2% | 91.3% | 90.9% | 83.4% | 86.9% | 85.1% | 88.6% | 91.3% | 87.4%   | 3.9% | 4.5%                     |
| 2019 | 87.8% | 82.0% | 86.5% | 92.5% | 88.9% | 86.1% | 81.1% | 81.8% | 84.7% | 85.6% | 85.7%   | 3.7% | 4.3%                     |
| 2020 | 85.5% | 79.3% | 85.3% | 93.6% | 92.9% | 88.1% | 84.0% | 87.4% | 84.7% | 92.5% | 87.3%   | 4.8% | 5.5%                     |
